1 **Dynamic utilization of low-molecular-weight organic substrates across a microbial growth**  
2 **rate gradient**

3

4 K. Taylor Cyle<sup>1</sup>, Annaleise R. Klein<sup>2,4</sup>, Ludmilla Aristilde<sup>2,3</sup>, Carmen Enid Martínez<sup>1#</sup>

5

6 <sup>1</sup>Soil and Crop Sciences, School of Integrative Plant Science, College of Agriculture and Life  
7 Sciences, Cornell University, Ithaca, NY, 14853, USA

8 <sup>2</sup>Department of Biological and Environmental Engineering, Cornell University, Riley-Robb Hall,  
9 Ithaca, NY 14853

10 <sup>3</sup>Department of Civil and Environmental Engineering, McCormick School of Engineering and  
11 Applied Science, Northwestern University, Evanston, IL, 60208, USA

12 <sup>4</sup>Australian Synchrotron, Australian Nuclear Science and Technology Organisation, Clayton,  
13 VIC 3168 Australia.

14

15 **Corresponding Author**

16 #email: cem20@cornell.edu

17

18

19 **Keywords**

20 Ecophysiology, nominal oxidation state of carbon, low molecular weight, time-resolved  
21 metabolic footprinting, carbon use efficiency

22

23 **Abstract**

24 Constantly in flux, low-molecular-weight organic substances (LMWOSs) are at the nexus  
25 between microorganisms, plant roots, detritus, and the soil mineral matrix. Nominal oxidation  
26 state of carbon (NOSC) has been put forward as one way to parameterize microbial uptake rates  
27 of LMWOSs and efficiency of carbon incorporation into new biomass. In this study, we  
28 employed an ecophysiological approach to test these proposed relationships using targeted  
29 exometabolomics ( $^1\text{H-NMR}$ , HR-LCMS) coupled with stable isotope ( $^{13}\text{C}$ ) probing. We assessed  
30 the role of compound class and oxidation state on uptake kinetics and substrate-specific carbon  
31 use efficiency (SUE) during the growth of three model soil microorganisms (*Penicillium*  
32 *spinulosum*, *Paraburkholderia solitsugae*, and *Ralstonia pickettii*) in media containing  
33 common LMWOSs. Microbial isolates were chosen to span a gradient in growth rate (0.046-  
34  $0.316\text{ hr}^{-1}$ ) and differ phylogenetically (a fungal isolate and two bacterial isolates). Clustered, co-  
35 utilization of LMWOSs occurred for all three organisms, but temporal cluster separation was  
36 most apparent for *P. solitsugae*. Potential trends ( $p < 0.05$ ) for early utilization of more oxidized  
37 substrates were present for the two bacterial isolates (*P. solitsugae* and *R. pickettii*), but high  
38 variability ( $R^2 > 0.15$ ) and a small effect of NOSC indicate these are not useful relationships for  
39 prediction. The SUEs ranged from 0.16-0.99 and the hypothesized inverse relationship between  
40 NOSC and SUE was not observed. Thus, our results do not provide compelling support for  
41 NOSC as a predictive tool, implying that metabolic strategies of organisms may be more  
42 important than chemical identity in determining LMWOS cycling in soils.

43

44

45

## 46 **Importance**

47 Community-level observations from soils indicate that low-molecular-weight compounds of  
48 higher oxidation state tend to be depleted from soil solution faster and incorporated less  
49 efficiently into microbial biomass under oxic conditions. Here, we tested hypothetical  
50 relationships between substrate chemical characteristics and the order of substrate utilization by  
51 aerobic heterotrophs at the population-level in culture, using two bacterial isolates (*Ralstonia*  
52 *pickettii* and *Paraburkholderia solitsugae*) and one fungal isolate from soil (*Penicillium*  
53 *spinulosum*). We found weak relationships indicating earlier uptake of more oxidized substrates  
54 by the two bacterial isolates but no relationship for the fungal isolate. We found no relationship  
55 between substrate identity and substrate use efficiency. Our findings indicate that substrate  
56 chemical characteristics have limited utility for modeling the depletion of low-molecular-weight  
57 organics from soil solution and incorporation into biomass over broader phylogenetic gradients.

58

## 59 **Introduction**

60 Low-molecular-weight organic substances (LMWOSs) represent the interface between  
61 the microbial cell and the decomposition of organic inputs into soil and have long been  
62 understood to be critical to soil processes (1, 2). This pool of soil organic carbon is a relatively  
63 small fraction of total dissolved organic carbon at any one point in time, with concentrations of  
64 individual compounds typically at less than 1 mM (3). Rapid cycling of LMWOSs involves their  
65 partitioning into microbial biomass, metabolic respiration to CO<sub>2</sub>, and contribution to the  
66 formation of mineral-associated organic matter (MAOM) (4, 5). The LMWOSs are released into  
67 solution through the action of exoenzymes depolymerizing particulate plant material and actively  
68 exuded by plant roots to shape soil microbial communities (6), thus altering soil solution nutrient

69 composition (7). While there is an emerging understanding of the complex signaling roles of  
70 LMWOSs (8), they primarily serve as the currency of the subterranean economy, providing both  
71 the carbon and energy source to support heterotrophic microbial populations. Therefore, a  
72 mechanistic understanding of microbial uptake and transformation of LMWOSs is warranted as  
73 this is the process through which the majority of soil respiration is produced (9) and a pivotal  
74 step in the formation of MAOM (10).

75 In fact, microbial uptake of LMWOSs in soil solution is much faster than sorption onto  
76 soil particles, thus highlighting the importance of microbial processing on the long-term fate of  
77 LMWOS-derived carbon and nitrogen in soils (11). Uptake rates tend to be extremely rapid (< 30  
78 min) and previous studies have indicated that the half-life of the compound in soil is influenced  
79 by the compound class (3, 12). More oxidized compounds, such as organic acids, have been  
80 shown to be removed from soil solution and appear in respired CO<sub>2</sub> at faster rates than less  
81 oxidized compounds, such as sugars and amino acids (4, 13-16). Isotope (<sup>13</sup>C, <sup>14</sup>C) tracer  
82 experiments have shown different affinity of cellular transport systems involved in uptake (17)  
83 by thousands of taxa (18).

84 Once transported within a microbial cell, LMWOSs are routed through metabolic  
85 pathways and incorporated into biomass production (anabolism, assimilation) or mineralized to  
86 CO<sub>2</sub> while producing reducing equivalents (catabolism, dissimilation) (19, 20). Accurately  
87 modeling the partitioning between anabolism and catabolism, referred to as carbon use efficiency  
88 (CUE), is critical to forecasting future changes in the soil carbon sink (21-23). Carbon use  
89 efficiency has been observed to vary due to intrinsic physiological strategies (e.g., growth rate,  
90 genome size) as well as to external conditions (e.g., temperature, moisture, substrate quality,  
91 nutrient limitations) (24-26). At the scale of individual compounds, the internal energy content of

92 the substrate being metabolized (denoted here as nominal oxidation state of carbon, NOSC) is  
93 one promising determinant of CUE (19, 27, 28). In this framework, due to energy limitations, the  
94 metabolism of the relatively more oxidized LMWOSs (higher NOSC) (e.g., organic acids) is  
95 hypothesized to result in lower assimilation efficiencies when these substrates are used as sole  
96 carbon sources. While the prevalence of oxygen in surface soils is typically considered to relieve  
97 thermodynamic limitations, recent field and laboratory observations have shown  
98 thermodynamics to still be a key regulator of aerobic respiration in carbon-limited aquatic  
99 systems (29-31) and this is supported by observations in intact soils as well (15).

100         Moreover, it is not likely that substrates are used sequentially by microbial populations  
101 when inhabiting environments containing diverse, low-concentration LMWOSs (32-34).  
102 Microbial metabolism may leverage the ability to route LMWOS-carbon from individual  
103 substrates divergently to anabolism or catabolism, thus producing specific substrate use  
104 efficiencies (SUE) that differ from relationships predicted from growth on a single substrate  
105 alone (19). Metabolomics using isotope labeling have observed nonuniform metabolic routing of  
106 assimilated substrates (35) and demonstrated the dynamic activation of specific metabolic  
107 pathways coinciding with the clustered, co-utilization of substrates in model organisms (36).

108         There is accumulated evidence that molecular size, compound class, and NOSC may be  
109 useful predictors uptake kinetics and use efficiency of LMWOS in soils and these concepts are  
110 being incorporated into substrate explicit modeling frameworks (37, 38). It is currently unclear  
111 whether correlations between compound characteristics and substrate utilization patterns (39) can  
112 be broadly applied to all aerobic heterotrophs in soil environments or whether these correlations  
113 simply arise from niche partitioning (e.g., faster-growing community members prefer to  
114 metabolize more oxidized substrates than slower-growing community members) (39). Therefore,

115 there is a need to conduct ecophysiological studies to understand substrate utilization profiles  
116 and metabolic use across the breadth of microbial diversity in soil. Though reductionist by  
117 design, studies of this category are necessary for asking fundamental questions about the  
118 influence of substrate chemistry on the microbial metabolism of carbon and for providing  
119 parameter bounds to modelers. They may show utility for building predictive models of  
120 microbial community interactions (40) and complementing observations from the field when  
121 done under realistic conditions of substrate diversity and concentration (41).

122         Here the aim of our study was to investigate the role of compound class and NOSC on  
123 substrate utilization profiles, uptake rates, and use efficiency at the microbial population level.  
124 For this work, we have grown three microbial strains isolated from a forest soil in a defined  
125 media with 34 LMWOSs at realistic, equimolar concentrations (25  $\mu$ M each). The chosen  
126 isolates represented distinct phylogenies, an ascomycete (*Penicillium spinulosum*) and two  
127 closely related to Betaproteobacteria (*Paraburkholderia solitsugae*, and *Ralstonia pickettii*),  
128 which exhibited a range of growth rates in the defined media. We put forth three hypotheses: (1)  
129 that there is a negative relationship between substrate NOSC and the midpoint of substrate  
130 uptake; (2) that there is a negative relationship between NOSC and SUE; (3) that individual  
131 SUEs would diverge widely from the cumulative CUE in accordance with co-utilization and  
132 segregated routing of carbon substrates within carbon metabolism. We employed time-resolved  
133 exometabolomics to characterize the depletion of compounds from extracellular solution during  
134 their growth. Here, substrate depletion in the extracellular media is assumed to be due to cellular  
135 uptake. Parallel experiments using treatments with selective isotopically labeled LMWOS were  
136 performed to determine SUE in a mixed-substrate media. Our findings provide insights on the

137 utility of the inherent chemical characteristics of potential substrates as predictors of microbial  
138 preferences and usage efficiencies.

139

## 140 **Results**

141 **Faster growth led to increased biomass production.** The chosen microbial isolates,  
142 which ranged in growth rate in minimal defined media, exhibited a normalized specific growth  
143 rate ( $\mu$ ) of 0.04-0.32 hr<sup>-1</sup> (Table 1, Fig. S1). The bacterial isolates (*R. pickettii*, *P. solitsugae*)  
144 grew faster and exhibited much shorter lag times than the fungal isolate (*P. spinulosum*) (Table  
145 1, Fig. S1). Despite having a longer lag phase than *P. solitsugae*, the fastest growing isolate, *R.*  
146 *pickettii*, produced the most biomass in the shortest time (Table 1). Accordingly, the biomass  
147 data collected from labeled growth trials show that *R. pickettii* produced more cellular biomass  
148 (in mg) per OD unit (higher *k*) than *P. solitsugae*. While *R. pickettii* and *P. spinulosum* had  
149 similar cellular carbon contents, *P. solitsugae* had substantially less carbon per cellular dry mass  
150 (Table 1). These results showed the choice of isolates represented a gradient in growth rates,  
151 with faster growth resulting in more biomass but not necessarily more biomass carbon.

152 **Clustered LMWOS utilization in terms of compound class and NOSC.** Throughout  
153 their growth, the three microbial isolates depleted nearly all LMWOS by at least 50% from the  
154 initial concentrations in the extracellular media (Fig. 1, Fig. S3-S5). The transposition of  
155 modeled substrate uptake inflection points of (*t*<sub>50</sub>) and usage time windows onto the growth  
156 curve of the isolate allowed comparisons of substrate usage patterns and usage overlap (Fig. 1).  
157 Using a k-means approach, three distinct uptake clusters (Cluster A, B, C) were identified for  
158 each isolate (Fig. 1A, 1C, 1E). The uptake of LMWOS occurred continuously whereby *t*<sub>50</sub> values  
159 for substrates were distributed throughout the growth curve (Fig. 1B, 1D, 1F). Between the

160 isolates, the clearest temporal separation of clusters was evident during substrate uptake by *P.*  
161 *solitsugae* (Fig. 1C), partially due to the presence of  $t_{50}$  values early during the growth curve  
162 which were assigned to Cluster A (Fig. 1D). During the growth of *P. solitsugae*, a large  
163 proportion of each Cluster A substrate was depleted from the media (~75%, 12 h) before  
164 significant depletion of any Cluster B and C substrates (Fig. 1D). Clustering of substrate uptake  
165 for *R. pickettii* (Fig. 1A) and *P. spinulosum* (Fig. 1E) produced uptake groups with less temporal  
166 distinction and  $t_{50}$  values more closely centered around the midpoint of total carbon depletion  
167 than observed for *P. solitsugae* (Fig. 1D-E, Fig. S2). Greater than 70% of organic acid substrates  
168 were present in the earliest cluster for both bacterial isolates (Fig. 1B, 1D, Fig. 2A-B). Few  
169 compounds had significant early uptake by the fungus, *P. spinulosum*, with cluster A comprised  
170 of cysteine, gluconate, and the much slower uptake of glycine (Fig. 1F). In contrast to the  
171 bacterial isolates, *P. spinulosum* assimilated all organic acids except for gluconate in the last  
172 cluster, Cluster C (Fig. 1F, Fig. 2C). Clusters A and B were depleted completely for both  
173 bacterial isolates (Fig. 1A, 1C), while only Cluster B was depleted completely for *P. spinulosum*  
174 (Fig. 1E).

175 We did not obtain compelling evidence of a correlation between substrate NOSC and  
176 substrate  $t_{50}$  for any isolate (Fig. 2). The strongest potential trends were observed for *R. pickettii*  
177 and *P. solitsugae*, where the overall linear relationship between NOSC and the mean midpoint of  
178 substrate depletion (normalized  $t_{50}$ ) could be explained by the equations (normalized  $t_{50} = 0.664$   
179  $- 0.045$  NOSC, adj  $R^2 = 0.101$ ,  $p = 0.05$ ) and (normalized  $t_{50} = 0.572 - 0.127$  NOSC, adj  $R^2 =$   
180  $0.146$ ,  $p = 0.019$ ), respectively (Fig. 2A-B). These potential trends appear to be driven by the  
181 earlier average uptake of organic acids as compared to amino acids by both isolates (t-test results  
182 are  $p = 0.037$ ,  $p < 0.001$ , respectively) (Fig. 2B-C). No significant correlation was observed for



183 LMWOS uptake for *P. spinulosum* (Fig. 2C,  $p = 0.974$ ), mostly due to the later uptake of three  
184 organic acids (malate, fumarate,  $\alpha$ -ketoglutarate), though there was a trend for the earlier uptake  
185 of more oxidized amino acids (normalized  $t_{50} = 0.489 - 0.040$  NOSC,  $\text{adj } R^2 = 0.232$ ,  $p = 0.014$ ).  
186 Despite a significant p-value ( $< 0.05$ ) for some linear regression models in relation to the  
187 hypothesis of a correlation between NOSC and substrate utilization, all the linear regression  
188 models had a low adjusted  $R^2$  ( $< 0.25$ ), which indicated high variability, and a small slope ( $<$   
189  $0.13$  NOSC), which indicated a relatively minor effect of NOSC unit on the midpoint of  
190 substrate depletion (regressions not shown).

191 Maximum substrate depletion rates decayed exponentially during population growth  
192 when displayed as a biomass normalized rate (Fig. 3A-C, Table S2-S4). Biomass-normalized  
193 substrate depletion rates were generally below  $6.10 \mu\text{mol h}^{-1} \text{mg}_{\text{CDW}}^{-1}$  for the two bacterial  
194 isolates (Fig. 3D-E, Table S2-S3), but the fungal biomass-normalized substrate depletion rates  
195 were much lower, predominantly below  $0.15 \mu\text{mol h}^{-1} \text{mg}_{\text{CDW}}^{-1}$  (Fig. 3F, Table S4). Though  
196 organic acids generally trended towards higher biomass-normalized depletion rates for the *P.*  
197 *solitsugae* (Fig. 3), no significant differences between depletion rates by compound classes were  
198 observed for any isolate.

199 **Substrate respiration dynamics, growth efficiency and substrate use efficiency of**  
200 **selected substrates.** Labeled growth trials were used to track 5 specific substrates (glucose,  
201 acetate, formate, glycine, valine) that ranged in NOSC ( $-0.8 - 2$ ) in the defined media (Fig. 4).  
202 All labeled substrates were respired (e.g., converted to  $\text{CO}_2$ ) to various degrees (Fig. 4A-C). The  
203 production of respired  $^{13}\text{CO}_2$  could be modeled in all cases except for *R. pickettii*'s respiration of  
204  $^{13}\text{C}$ -formate (Fig. 4A, Table S5). Though insufficient data from early portions of the growth  
205 curve prevented fitting, the  $t_{50}$  of  $^{13}\text{C}$ -formate respiration must have been less than 11.5 hours

206 which was the first sampling time (Fig. 4A). In terms of initial media concentrations, the  
207 cumulative substrate-derived carbon that was respired from labeled substrates ( $\text{CO}_2\text{-C}$ ,  $a$ )  
208 straddled the proportion for all carbon sources for all isolates (Fig. 4A-C, Table S5). Cumulative  
209 respired  $\text{CO}_2\text{-C}$  ranged from 12.74-25.29% of LMWOS-carbon present in the media (Fig. 4A-C,  
210 Table S5). In all cases, carbon from the organic acids and sugar (acetate, formate, and glucose)  
211 appeared in respired  $\text{CO}_2$  earlier (lower  $t_{50}$ ) and more rapidly (smaller  $w$ ) than the average of all  
212 carbon substrates (Fig. 4A-C, Table S5). The  $t_{50}$  of respiration of these three substrates ranged  
213 from 0.19-6.07 h before the average of all substrates for bacterial isolates and 13.5-19.52 h for  
214 the fungal isolate (Fig. 4A-C, Table S5). The cumulative proportion of formate-carbon in  
215 respiration was at least 1.77-fold higher than any other substrate for all isolates and ranged from  
216 19.84-59.19% of added substrate-carbon (Fig. 4A-C, Table S5). The two amino acids, glycine  
217 and valine, had respiratory curves that were later (higher  $t_{50}$ ) than overall  $\text{CO}_2$  production for all  
218 isolates (Fig. 4A-C, Table S5). This was most pronounced for valine for the two bacterial  
219 isolates, where valine was not respired until the beginning of stationary phase, representing a  
220 delay of greater than 3.09 h from the average of all LMWOSs respired, or greater than 16.3% of  
221 the total growth curve (Fig. 4A-B, Table S5). In contrast, respiration of glycine and valine much  
222 more closely followed overall respiration for *P. spinulosum*, with differences in  $t_{50}$  ranging from  
223 0.5-4.05 h or less than 4.2% of the total growth curve (Fig. 4C).

224 Estimates of SUE produced values ranging from 0.16-0.99 (Fig. 4D-I, Fig. S7). The  
225 largest divergence in SUEs between highest and lowest efficiencies was found during the growth  
226 of *P. solitsugae* (Fig. 4E, 4H). For the two bacterial isolates, *R. pickettii* and *P. solitsugae*,  
227 substrates that appeared in respired  $\text{CO}_2$  earlier (lower  $t_{50}$ ) than the other substrates had relatively  
228 lower SUEs ( $\text{SUE} = 0.027 t_{50} + 0.418$ ,  $p = 0.025$  and  $\text{SUE} = 0.078 t_{50} - 0.807$ ,  $p = 0.011$ ,

229 respectively) (Fig. 4D-E). There was no obvious trend between substrate respiration kinetics and  
230 SUE for *P. spinulosum* (Fig. 4F). Both *R. pickettii* and *P. spinulosum* exhibited a smaller range  
231 of SUE values, all of which (except formate) were at or near the overall CUE value, which was  
232 0.84 and 0.76, respectively (Fig. 4G, 4I). These two isolates had a higher CUE than *P.*  
233 *solitsugae*, whose CUE was estimated at 0.54 (Fig. 4H). Formate had a significantly lower SUE  
234 for all isolates, never exceeding 0.31. No significant trends ( $p < 0.1$ ) between the NOSC and  
235 SUE were found for any isolate (Fig. 4G-I).

236

## 237 **Discussion**

238 This study aimed to characterize the substrate utilization profiles, uptake rates, and  
239 metabolic partitioning of carbon (CUE, SUE) of three soil microbial isolates with different  
240 growth rates. Using equimolar LMWOS concentrations and a diversity of substrates reflecting  
241 those present at the field site of isolation (32), we aimed to investigate the role of substrate  
242 energy content (NOSC) without confounding concentration differences. Stationary phase was  
243 chosen as the point of assessment for population-level carbon use efficiency (CUE<sub>p</sub>) to minimize  
244 the influence of secondary metabolite turnover on respiration measurements (21). While  
245 LMWOS are re-supplied in soil solution frequently, especially in the rhizosphere, these  
246 experiments mimic resource pulse events that induce microbial growth.

247 **Faster growth did not result in lower CUE.** Specific bacterial phyla, such as  
248 Betaproteobacteria and Bacteroidetes, are known to grow rapidly in response to resource-pulses  
249 and this rapid growth is correlated positively to C-amendment levels in soil (42). Though the  
250 fungal community often represents a larger proportion of total microbial biomass (43),  
251 fungal:bacterial ratios derived from growth-based measurements made in C-units show bacterial

252 dominance (F:B ranging from 0.02-0.44) in surface soils across a large gradient of ecosystem  
253 types (44). Rapid incorporation of labeled substrate pulses into the phospholipids of  
254 Betaproteobacteria also support the view that r-strategist fractions of the community are  
255 competitive LMWOS incorporators (39). In accordance with this paradigm, our growth data  
256 illustrated faster growth (Table 1) and higher substrate depletion rates (Fig. 3) by the two  
257 Betaproteobacteria compared to the ascomycete. Our growth rates in defined media were within  
258 the range of reported specific growth rates from intact soils (45-47). *P. solitsugae* grew faster in  
259 this defined media than in soil extract from the field site of origin (0.29 vs 0.17 hr<sup>-1</sup>) (32),  
260 indicating that estimated growth rates for these isolates are likely to be lower in intact soils.  
261 Lowered rates in more chemically complex soil solution are potentially due to induced stress  
262 from other compounds present (e.g., antibiotics) or reduced bioavailability of LMWOS.  
263 Evaluations of fungal-to-bacterial dominance in long-term experiments (48) and laboratory  
264 assessments (44) have shown increased fungal response to high quality plant litter inputs,  
265 complicating the broad delineation that r-strategists (such as Betaproteobacteria) are the first  
266 responders to LMWOS inputs. Fungal species, such as *P. spinulosum*, may have competitive  
267 advantages in a complex soil environment other than growth rate, including the ability to explore  
268 more soil pore volume for available substrates (49). Faster growth is often assumed to come at  
269 the expense of CUE (24), representing a tradeoff between the ability to rapidly compete for  
270 available substrates and the efficiency of their incorporation into new cellular material.

271 Our estimates of cumulative CUE (Fig. 4G-I) did not align with theories of lower CUE  
272 from faster growing bacterial phylogenies (26, 50). The CUE estimates (0.54-0.84), calculated  
273 using biomass and CO<sub>2</sub> datasets collected with population cultures of each organism, were about  
274 the same as or higher than the average estimate from soil microbial communities of ~0.55 (24)

275 and higher than CUE measurements taken at larger temporal or spatial scales, which range from  
276 ~0.2-0.5 (51, 52). Though higher values are expected for measurements at the population level  
277 ( $CUE_p$ ) (21), our observations approached the theoretical maximum efficiency (0.88) of reduced  
278 compounds (19, 53). Lower CUEs in soil may result from increased biomass maintenance costs,  
279 nutrient limitation, and resource limitation (24, 54, 55), though certain discrepancies may be a  
280 result of methodological considerations (56). The defined media used in this experiment was not  
281 nutrient limited and all carbon substrates were in monomer form, likely providing favorable  
282 conditions for organisms to grow at their maximum potential efficiency. The correlation between  
283 growth rate and CUE has been shown to be complex and sometimes inconsistent (50). It was not  
284 therefore surprising that we did not observe any correlation between growth rate and CUE under  
285 these growth conditions. Furthermore, as described in a revised trait-based theory of microbial  
286 life history (Y-A-S), high growth rate may result from any ecological strategy paired with the  
287 right context and does not necessarily entail a tradeoff with yield (57).

288 **LMWOS utilization: Evidence for substrate co-utilization.** Microbial substrate  
289 utilization preferences are thought to arise from the competitive advantage substrates offer to  
290 whichever ecological strategy is employed by the organism. Termed carbon catabolite  
291 repression, most microbes sequentially move through LMWOS that offer higher potential growth  
292 rates or yields (58, 59). Heterotrophic microorganisms have been known to deviate from  
293 sequential, diauxic growth when diverse substrates are present at low concentrations (34) and  
294 new exometabolomic work has stressed substrate co-utilization as a typical phenomenon (36,  
295 40). Here, our data also provided evidence for diauxie and co-utilization in our substrate uptake  
296 dynamics for all isolates, characterized by clustered substrate uptake patterns with overlapping  
297 usage windows (Fig. 1).

298           The growth of the bacterial isolate, *P. solitsugae*, provided the strongest case for  
299 clustered substrate co-utilization, with broader substrate usage across the growth curve and more  
300 distinct cluster dynamics than the other two isolates (Fig. 1C-D). By comparison, *R. pickettii* and  
301 *P. spinulosum*, had more tightly grouped substrate clusters centered around the midpoint of total  
302 carbon depletion from the media (Fig. 1A-B, Fig. 1E-F, Fig. 3D, 3F). High resolution sampling  
303 along the growth curve may be needed to observe lags in growth, which would be indicative of  
304 changes in membrane transport system regulation as the population switched to a new cluster of  
305 substrates, such as in the case of *P. solitsugae*. Thus far, we have assumed that growth of these  
306 microbial populations relied on a relatively homogeneous metabolism within the population at  
307 any point in time. However, there could be anabolic heterogeneity within the population, as has  
308 been shown with single-cell studies (60), and this fluctuating heterogeneity could explain some  
309 of our divergence in substrate uptake between isolates. Phenotypic heterogeneity in terms of  
310 metabolism has been observed in clonal *Saccharomyces cerevisiae* populations under nutrient-  
311 limited conditions and is likely common in microbial populations (61, 62). Regardless of the  
312 mechanism leading to both diauxic and co-utilization patterns during substrate uptake, prior  
313 work with a marine heterotroph, *Pseudoalteromonas haloplanktis*, as well as two common soil  
314 pseudomonads indicate that potential substrate-specific growth rate may still dictate substrate  
315 preference (36, 40).

316           The ordering of LMWOS utilization could arise from the interplay between the  
317 expression of membrane transporter systems, system affinity, and the metabolic processing rates  
318 of the substrate inside the cell (17). We found substantial uptake of organic acids predominantly  
319 in the initial cluster (Cluster A) for both bacteria, but not for the fungal isolate (Fig. 2). These  
320 data are consistent with prior observations of the earlier uptake of organic acids compared to

321 sugars and amino acids from soil solution by intact soil communities (4, 15), implying that this  
322 phenomenon is driven by fast-responding, bacterial populations similar to the two  
323 Betaproteobacteria examined in this study. Early organic acid uptake at the population-level in  
324 these bacteria may be due to the need for reducing equivalents from the metabolism of citric acid  
325 cycle intermediates when initiating growth, albeit not all organic acids (e.g., gluconate, formate,  
326 pyruvate) feed into the TCA cycle directly. The LMWOS substrate uptake ordering may also be  
327 dictated by transporter system expression more than the affinity of the different transporter  
328 systems. Our uptake rates (Fig. 3A-B) were comparable with the lowest rates measured for other  
329 soil bacterial species (40) and 2-3 orders of magnitude below modeled maximum substrate  
330 uptake rates ( $<74.9 \mu\text{M substrate (mg C biomass)}^{-1} \text{ hr}^{-1}$  vs.  $33,000 \mu\text{M substrate (mg C biomass)}^{-1}$   
331  $\text{hr}^{-1}$ ) (63). Fungal uptake rates were substantially lower than bacterial uptake rates (Fig. 3C),  
332 potentially due to either lower transporter affinities or lower expression, or both.

333 **NOSC as a predictor of substrate preferences and use efficiencies.** Substrate  
334 oxidation state, NOSC, stands to directly impact preferences and SUE via thermodynamic  
335 constraints on internal metabolism or energetic payoffs (19). Thermodynamic regulation of  
336 metabolic rates is typically only considered when terminal electron acceptors, such as  $\text{O}_2$ , are  
337 limiting, but there is growing support this phenomenon would also occur in carbon-limited, oxic  
338 environments (29). This regulation arises from the higher energy requirement ( $\Delta G^\circ_{\text{Co}_x}$ ) of the  
339 oxidation half reaction as the substrate becomes more reduced (lower NOSC). The defined media  
340 used here can be inferred to be C-limited due to excess  $\text{NH}_4^+$  supplied and since most amino acid  
341 LMWOS provide C:N at a ratio lower than biomass production demands.

342 Support for thermodynamic limitations from our substrate uptake observations are  
343 tenuous. We observed a negative correlation between NOSC and normalized substrate  $t_{50}$ ,

344 indicating an earlier and more rapid uptake of oxidized (NOSC  $\geq 0$ ) organic acids, but only for  
345 the two bacterial species (Fig. 2A-B). The early utilization of oxidized substrates by bacterial  
346 species was further corroborated in the labeled experiments, where we observed the appearance  
347 of  $^{13}\text{CO}_2$  from LMWOSs with a higher NOSC (e.g., formate and acetate) before other labeled  
348 substrates with lower NOSC (Fig. 4D, 4E). While there can be a decoupling of substrate uptake  
349 and metabolic use in certain situations, this is a reasonable indicator of uptake. In instances  
350 where extracellular and respiration data were both present,  $t_{50}$  values were similar or respiration  
351 data was slightly delayed. For the fungal species, there was no clear trend between NOSC and  
352 the midpoint of substrate depletion ( $t_{50}$ ) from unlabeled (Fig. 2C) or labeled experiments (Fig.  
353 4F). It is unclear why there was not early uptake of more oxidized, organic acids by *P.*  
354 *spinulosum*, but this may reflect a metabolic strategy prioritizing sugar uptake (glucose,  
355 galactose, xylose). The potential trends we observed from unlabeled and labeled experiments for  
356 the two bacteria (Fig. 2A-B, Fig. 4D-E) provide some population-level support for whole  
357 community observations of faster uptake and mineralization of oxidized carboxylic acids  
358 (succinic acid, malic acid, formic acid) (15).

359         There were no significant trends supporting thermodynamic limitations on SUE (i.e.,  
360 negative correlation between NOSC and SUE) (Fig. 2.4G-I). For all isolates, formate had the  
361 lowest SUE ( $< 0.31$ ), which is comparable to low anabolism/catabolism estimates in soil (15).  
362 SUE estimates of the two amino acids (glycine and valine) were higher than expected for the  
363 bacterial species under a hypothesized NOSC-SUE relationship (Fig. 4G-H) but similar in  
364 magnitude to previous observations (64). These high SUE values could be due to the demand for  
365 direct incorporation into proteins during rapid growth (65, 66). For the bacterial isolates, the  
366 disconnect between the overall relationship between substrate respiration dynamics and SUE



367 (Fig. 4D, 4E) and the lack of a significant relationship between NOSC and SUE (Fig. 4G, 4H)  
368 may reflect a stronger control by metabolic entry points of the chosen LMWOS traced (39, 64,  
369 66). The low SUE estimates for formate, for example, may be a result of the limited metabolic  
370 entry points for formate-derived carbon, which is assimilated by heterotrophs typically after  
371 conversion to CO<sub>2</sub> by formate dehydrogenases (67, 68). Thus, formate utilization by these three  
372 isolates represents heterotrophic CO<sub>2</sub> fixation via anaplerosis and, while still a significant route  
373 of C utilization (69), comprises a drastically different metabolic usage than the assimilation of  
374 the other labeled carbon substrates in organic form. While used previously in assessments of  
375 NOSC and SUE relationships (15), the distinct metabolic entry pathway for formate and  
376 inherently low incorporation of C via anaplerosis by heterotrophs (69) may be driving observed  
377 correlations between NOSC and SUE. Any future assessments of substrate NOSC should include  
378 alternative oxidized substrates (e.g., oxalate) that are known to be incorporated directly (70).

379         The lack of consensus across all three isolates implies NOSC is not a reliable parameter  
380 for predicting substrate utilization patterns or SUE. While predicted relationships between NOSC  
381 and LMWOS *t*<sub>50</sub> from bacterial observations agree with those produced in other stable isotope  
382 tracer experiments in soils (15), the population-level trends we observed were not strong (adj R<sup>2</sup>  
383 < 0.12) and not present in data from the fungal isolate (Fig. 5). It remains unknown if the earlier  
384 use of oxidized organic acids than other substrates by these bacteria, whether a result of  
385 metabolism regulation or transporter affinity, would still be apparent with unequal substrate  
386 concentrations as is typical in soil solution (32). Previous attempts to connect the processing of  
387 LMWOS in soil to inherent chemical properties, such as C:N or molecular weight, have provided  
388 inconclusive results (71). Similarly, our results stress that a fuller understanding of the internal

389 biochemical pathways, and not substrate NOSC alone, is necessary to predict LMWOSs cycling  
390 in soils (66).

391 Tracking the transformation of LMWOSs into soil carbon pools with longer turnover  
392 times requires knowledge of the principles governing microbial uptake and metabolic  
393 transformation. Many current conceptual frameworks for understanding these processes revolve  
394 around tradeoffs between microbial growth rate and CUE and the energy content of the  
395 LMWOS. Clustered substrate utilization was observed for all three microbial isolates cultured,  
396 indicating metabolic co-utilization of LMWOSs during growth. We only found potential trends  
397 ( $p < 0.05$ ) supporting the preferential uptake of LMWOSs with higher NOSC for the two  
398 Betaproteobacteria, though variability was high and the overall effect of NOSC was small. We  
399 found no support for relationships between NOSC and SUE, highlighting the need to understand  
400 better the intracellular metabolism of LMWOS-carbon during growth. Despite community-level  
401 observations depicting a negative relationship between NOSC and half-life in solution as well as  
402 NOSC and SUE, our findings suggest that these observations may reflect the primary  
403 involvement of rapidly responding bacterial populations and that extrapolation of these results to  
404 other aerobic contexts should be approached with caution. Our ecophysiological approach,  
405 probing the carbon usage of diverse LMWOSs at realistic soil solution concentrations, presents a  
406 platform to test foundational relationships between LMWOS identity and substrate use across a  
407 range of microbial phylogenetic diversity and environmental contexts.

408

## 409 **Materials and Methods**

410 **Microbial isolation and characterization.** All strains were isolated from both field  
411 moist Oa and B horizons found under a hemlock-dominated stand in Arnot Forest, New York,

412 USA. Three microbial strains were chosen from a library originally isolated using soil-  
413 extractable, solubilized organic matter (SESOM). All SESOM was derived from the Oa horizon.  
414 The extract was created using a modified water extraction (72), involving the suspension of 40 g  
415 of field-moist Oa horizon with 200 mL of 18.2 M $\Omega$ -cm water. Samples were shaken end-to-end  
416 for 1 hour at room temperature and then left to settle. After 24 hours, the solution was  
417 sequentially filtered through 1.6  $\mu$ m GF/A, 0.45  $\mu$ m polyethersulfone (PES), and then filter-  
418 sterilized using 0.2  $\mu$ m PES filters. Enrichment steps were conducted using fresh soil shaken  
419 with DI water (1:10 ratio) for 1 hour and then left standing for 24 hours at room temperature.  
420 Enrichments were serially diluted using Winogradsky salts (73) and a 100  $\mu$ L sample was then  
421 spread onto agar plates (15 g/L) created with SESOM as the sole C-source (denoted “N”) and  
422 with the addition of streptomycin and Rose Bengal (denoted “RB”). All plates were incubated in  
423 the dark at room temperature for 3-14 days. Colonies were chosen and re-streaked 3 times before  
424 growth was checked in SESOM liquid culture (2x dilution). Further details about the chemical  
425 characterization of SESOM and the growth of *Paraburkholderia solitsugae* in SESOM have  
426 previously been reported (32).

427 Isolates B3N, B1N, and Oa1RB were chosen based on growth rates in defined media and  
428 characterized using a combination of genomic approaches. Both bacterial species were identified  
429 using genomic DNA as discussed previously in Cyle et al., 2020. Briefly, genomic DNA was  
430 extracted from pelleted cells and submitted to the Cornell University Sequencing Facility for  
431 sequencing using three multiplexed runs of Illumina MiSeq Nano (2 x 250 bp). Fungal  
432 identification was conducted using ITS1F (CTTGGTCATTTAGAGGAAGTAA) and ITS4  
433 primers (TCCTCCGCTTATTGATATGC) (74). *Paraburkholderia solitsugae* was extensively  
434 characterized in prior works (32, 75). The other two isolates chosen are referred to by the species

435 name with which they have the highest similarity (Table S1). Isolate B3N was found to be most  
436 related to *Ralstonia pickettii*, a rod-shaped Betaproteobacterium (76), while isolate Oa1RB was  
437 found to be most related to *Penicillium spinulosum*, an ascomycete (77).

438 **Media preparation and culturing conditions.** All experiments were conducted in batch  
439 cultures using acid-washed and autoclaved 125-mL Erlenmeyer flasks using three biological  
440 replicates per treatment. Incubating flasks were maintained at room temperature on a shaker at  
441 150 rpm. Defined media was prepared based on potential carbon substrates utilized by *P.*  
442 *solitsugae* during growth in SESOM (32). To assess the relative role of NOSC on utilization  
443 profiles and use efficiencies of each substrate, all carbon substrates were added to the media at  
444 equimolar concentration (25  $\mu$ M each). Substrates included three sugars (glucose, galactose,  
445 xylose), 20 amino acids (alanine, arginine, asparagine, citrulline, cysteine, glutamate, glutamine,  
446 glycine, histidine, lysine, methionine, ornithine, isoleucine, leucine, lysine, phenylalanine,  
447 proline, serine, threonine, tryptophan, valine) and 10 organic acids (acetate,  $\alpha$ -ketoglutarate,  
448 citrate, formate, gluconate, lactate, malate, oxalate, pyruvate, succinate). The defined medium  
449 was filter-sterilized and subsequently supplemented with 1.68 mM  $\text{NH}_4\text{Cl}$ , 0.12 mM  $\text{KH}_2\text{PO}_4$ , 1x  
450 Wolfe's vitamins and 1x Wolfe's minerals solutions (78), and pH-adjusted to pH 4.5. The  
451 nutrient media was prepared in two different manners: (1) with all unlabeled substrates and (2)  
452 with a single substrate isotopically labeled with the remaining unlabeled substrates to allow the  
453 tracking of labeling into respired  $\text{CO}_2$  and into biomass.

454 Species were individually cultured in unlabeled defined media until exponential growth  
455 phase and then a sample of this culture was used to inoculate treatment flasks for experimental  
456 trials. For trials with bacterial species (*R. pickettii*, *P. solitsugae*), this involved overnight  
457 culturing and monitoring of growth using optical density at 595 nm ( $\text{OD}_{595}$ ) followed by

458 inoculation of 50 mL treatment flasks with less than a 250  $\mu$ L subsample (theoretical starting  
459  $OD_{595} \sim 0.0005$ ). For trials with *P. spinulosum*, biomass measurements were made using  
460 destructive sampling of biological replicates of starter flasks ( $n = 3$  per time point), filtration  
461 through 0.2  $\mu$ m PES filters, and mass determination after drying at 55°C for 1 hour. At roughly  
462 the inflection point of the growth curve, a single flask was sonicated for 5 minutes and 100  $\mu$ L  
463 volumes were used to initiate all treatments. All culturing work was conducted in a laminar flow  
464 hood using aseptic technique, sterile filter-pipette tips, and with negative controls ( $n = 3$ ) to  
465 ensure sterility was maintained.

466 **Unlabeled growth trials. (I) Time-resolved metabolic footprinting sampling.** For  
467 determining substrate utilization profiles, growth trials were conducted solely using the defined  
468 media with unlabeled substrates. A growth trial was initiated for each isolate as described above,  
469 with sufficient replicates to allow at least four destructive sampling time points across the  
470 organism's growth curve. For bacterial species (*R. pickettii*, *P. solitsugae*), destructive sampling  
471 consisted of centrifugation of  $\sim 40$  mL of the culture at 10,000  $\times g$  for 10 minutes.  
472 Supernatant was decanted and filtered through 0.2  $\mu$ m PES filters. For the fungal species (*P.*  
473 *spinulosum*), the entire culture of  $\sim 50$  mL was filtered through 0.2  $\mu$ m PES filters. All samples  
474 were immediately allocated into 2-mL centrifuge tubes and stored frozen ( $-20^{\circ}\text{C}$ ) until  
475 exometabolomics analysis. All filtered samples were analyzed using a Shimadzu TOC-V<sub>CPN</sub> for  
476 non-purgeable organic carbon (referred to as total organic carbon – TOC) and total nitrogen (TN)  
477 using a 2% acidification (0.2 M HCl) and 1:30 min sparge time using high temperature ( $720^{\circ}\text{C}$ )  
478 catalytic (Pt) oxidation.

479 **(II) Targeted analytes via LC-HRMS.** Stored samples were thawed and prepared for  
480 immediate analysis using liquid chromatography coupled with high resolution mass spectrometry

481 (LC-HRMS) as described in (32). Briefly, samples were analyzed using a Thermo Scientific  
482 Dionex Ultimate 3000 liquid chromatography system connected to a Q Exactive orbitrap mass  
483 spectrometer. A reversed-phase approach using a C18 column and negative electrospray  
484 ionization (79, 80) as well as a hydrophilic interaction approach using polarity switching (81)  
485 was used to quantitate substrate concentrations in the extracellular media. Quality control checks  
486 were run every 10 samples with a 30% standard deviation limit. All data was processed using an  
487 internally constructed template within Thermo Scientific Xcalibur 3.0 Quan browser using  
488 standards of all identified compounds run between 0-25  $\mu\text{M}$ . Reliable data on three compounds  
489 not intentionally added to the minimal media (fumarate, cystine, and homoserine) have been  
490 included in all analyses.

491 **(III) Targeted analytes via  $^1\text{H}$  NMR.** Samples were analyzed using proton nuclear  
492 magnetic resonance spectrometry ( $^1\text{H}$  NMR) to capture a select group of sugars and organic  
493 acids from the media that could not be quantified during some LC-HRMS analytical runs  
494 (glucose, galactose, xylose, acetate, formate, oxalate, valine). Methods used have been  
495 previously reported for extracted soil solutions (32, 72, 82). Briefly, 35-40 mL samples of frozen  
496 extracellular media were concentrated by lyophilizing the sample and reconstituting to a smaller,  
497 final volume of 500  $\mu\text{L}$ . Reconstitution involved 300  $\mu\text{L}$  of 18.2  $\text{M}\Omega\text{-cm}$  water and buffered to  
498 pH of 7.0 using an addition of 200  $\mu\text{L}$  of sodium hydrogen phosphate (0.1 mM, pH 7.0) made  
499 with 25%  $\text{D}_2\text{O}$  (vol/vol) to supply a lock signal and containing 1 mM sodium 3-trimethylsilyl-  
500 [2,2,3,3,- $\text{D}_4$ ]-1 propionic acid (TMSP) to provide spectral referencing at a final concentration of  
501 0.4 mM. All spectra were collected at 500 MHz at room temperature on a Bruker AV 500  
502 operated using Bruker TopSpin 3.5.7 using a 10%  $\text{D}_2\text{O}$  and water peak suppression program  
503 (noesygppr1d) with 32 scans/sample and a 5-s relaxation delay for a total of 256 transients.

504 Previously described spectral processing methods and integral regions (32) were used on all  
505 samples. Areas under the curve were normalized to initial media values for each experiment and  
506 used for depletion model fitting. No reliable sugar data was able to be collected, though in some  
507 cases valine, acetate, and formate were able to be modeled and are included in analyses.

508 **(IV) Curve fits for microbial growth and substrate depletion analysis.** Microbial  
509 growth was modeled using R 3.6.0 (83) using the nls.multstart package (84). Microbial growth  
510 was modeled in terms of biomass ( $\text{mg L}^{-1}$ ) to ensure equivalent comparison of growth rates  
511 between bacterial isolates, which were originally monitored in terms of OD<sub>595</sub>, and the fungal  
512 isolate, which was originally monitored in terms of biomass. Conversion from OD<sub>595</sub> to  $\text{mg L}^{-1}$   
513 for the bacterial species was conducted using a biomass conversion factor ( $k - \text{mg L}^{-1}$ , Table 1),  
514 determined on an OD unit basis using biomass data collected at stationary phase during the  
515 labeled growth trials. Growth was modeled using a reparametrized Gompertz equation (Eq. 1)  
516 (85) on untransformed biomass data to allow extraction of parameters with biological meaning  
517 and for visualization purposes,

$$518 \quad y = Ae^{-e^{\frac{\mu}{A}(\lambda-t)+1}} \quad (1)$$

519 where  $y$  is average biomass data ( $\text{mg L}^{-1}$ ),  $A$  is the stationary phase asymptote of the growth  
520 curve ( $\text{mg L}^{-1}$ ),  $t$  is time (h),  $\mu$  is the specific growth rate ( $\text{h}^{-1}$ ),  $\lambda$  is the lag time ( $\text{h}^{-1}$ ). A  
521 secondary fitting approach was employed using the growthrates package (86) to produce  
522 normalized estimates of specific growth rate ( $\mu$ ,  $\text{hr}^{-1}$ ) from average biomass data, readily  
523 allowing comparisons with literature values while avoiding biases from estimates of biomass  
524 from initial cell density ( $N_0$ ) (87).

525 Substrate depletion was analyzed based on pattern clustering, nonlinear modeling, and  
526 calculations of maximum depletion rate. Clusters of substrate depletion were identified for each

527 isolate using a k-means approach specifically suited for comparing trajectories. Substrate  
528 depletion observations, normalized to measured initial media concentrations, were analyzed  
529 using the kml package (88) in R 3.6.0 (83). Clusters were iteratively analyzed ensuring clusters  
530 of sufficient size (10%) and maximizing the Calinski-Harabanz index (89). Model fits of  
531 substrate depletion data and extracellular TOC were created for individual biological replicates  
532 using the nls.multstart package (84) as described previously (32, 40, 90). A nonlinear modeling  
533 approach (Eq. 2) allowed the fitting of a 4-point sigmoidal curve using the following equation:

$$534 \quad y = \frac{a}{1 + e^{-\frac{t-t_{50}}{w}}} + o \quad (2)$$

535 where  $y$  represented either concentration data ( $\mu\text{M}$ ) or in some cases was normalized relative to  
536 initial conditions (0-1) and  $t$  represents time (h). The four parameters produced during the fitting  
537 procedure relate to the amplitude of substrate depletion ( $a$ ,  $\mu\text{M}$  or unitless), the midpoint of  
538 depletion ( $t_{50}$ , h), the width of the concentration decrease ( $w$ , h), and the offset or predicted final  
539 value of substrate remaining in extracellular media ( $o$ ,  $\mu\text{M}$  or unitless). For visualization and  
540 comparison purposes, the midpoint of depletion ( $t_{50}$ ) has been chosen as the point to assess  
541 substrate uptake ordering. The width parameter has been modified in all figures to show a wide  
542 usage window towards capturing substrate use overlap. The usage window extends from 10% of  
543 total substrate utilization or where  $y = [(a-o) \times 0.9]$  as well as the time at which 90% of total  
544 substrate utilization has occurred or where  $y = [(a-o) \times 0.1]$ . In some cases, no fit was applied  
545 due to insufficient data or indications that a sigmoidal fit was not the appropriate model.  
546 Maximum depletion rate was determined by taking the differential of the modeled substrate  
547 depletion curve and calculating the rate at the inflection point ( $t_{50}$ ) (40) and expressing that value  
548 as a rate normalized in terms of cell dry weight ( $\mu\text{mol h}^{-1} \text{mg}_{\text{CDW}}^{-1}$ ). In some cases, the midpoint  
549 of depletion,  $t_{50}$ , has been normalized to the stationary phase sampling time (0-1) for easier



550 comparison across isolate growth curves. All two-group comparisons between compound classes  
551 were conducted using a Welch's t-test and the relationship between NOSC and normalized  $t_{50}$   
552 was assessed using linear regression.

553 **Labeled growth trials. (I) Respiration sampling during growth.** Growth trials were  
554 conducted for each isolate using labeled substrates (> 98%  $^{13}\text{C}$ , 99%  $^{15}\text{N}$ , Cambridge Isotope  
555 Laboratories, Inc.) to track C into  $^{13}\text{C}$  labeled microbial biomass as well as respired  $^{13}\text{CO}_2$ . Five  
556 labeled treatments were chosen to span low molecular weight compound classes (sugar, organic  
557 acid, amino acid) as well as nominal oxidation states of carbon (-0.8 – 2). Substrates included a  
558 sugar (glucose, NOSC = 0), two organic acids (acetate, NOSC = 0 and formate, NOSC = 2), and  
559 two amino acids (glycine, NOSC = 1 and valine, NOSC = -0.8). Each labeled treatment  
560 contained the labeled substrate as well as the remaining unlabeled 33 substrates.

561 Culturing was conducted as described previously except rubber septa were fitted after  
562 inoculation to seal off the headspace of the flask. At intervals during growth, 250  $\mu\text{L}$  headspace  
563 gas samples were taken using a 500  $\mu\text{L}$  gastight syringe. Gas samples were then injected into  
564 pre-evacuated, and helium (He) filled 2 mL glass crimp vials sealed with a PTFE/butyl septum.  
565 The quantity of  $^{12}\text{CO}_2$  (m/z 44) and  $^{13}\text{CO}_2$  (m/z 45) were measured using gas chromatography-  
566 mass spectrometry using a Shimadzu GCMS-QP2010S equipped with a Carboxen 1010 PLOT  
567 column and ultra-high purity He (Airgas, Inc.) as the carrier gas using previously described  
568 protocols (18, 91). Samples were run within 24 hours and each sample run was accompanied by  
569 standards ranging from 0-17,700 ppm created using  $\text{CO}_2$  (Airgas, Inc.). No purging was  
570 conducted in between sampling points, so all data represents cumulative buildup of  $\text{CO}_2$  in the  
571 headspace. All values are displayed as  $\text{CO}_2\text{-C}$  (% of addition). This was calculated by first  
572 subtracting natural abundance  $^{13}\text{CO}_2$  determined using the unlabeled control treatments. This

573 enriched  $^{13}\text{CO}_2$  value was converted to mg  $^{13}\text{C}$  and divided by the amount of labeled substrate  
574 supplied in the treatment. Cumulative  $\text{CO}_2$  curves were modeled using a modified version of  
575 equation 2 with the numerator altered to  $[-(x - t_{50})]$  to invert the 4-point sigmoidal fit for the  
576 hypothetical curve of mirrored  $\text{CO}_2$  release. The offset parameter ( $o$ ) was also set to 0 for this  
577 scenario.

578 **(II) Biomass harvest and isotopic measurements.** At the beginning of stationary phase,  
579 isolate biomass was destructively harvested from all culture flasks. Destructive sampling was  
580 conducted as described for unlabeled growth trials. All biomass, whether separated using a filter  
581 or centrifugation, was washed using 5 mL of C-free 1x Wolfe's minerals solutions. A portion of  
582 separated biomass was then submitted to the Cornell Stable Isotope Laboratory for combustion  
583 analysis using a Thermo Delta V isotope ratio mass spectrometer (IRMS) interfaced to a NC2500  
584 elemental analyzer.

585 **(III) Calculations and data visualization.** All post-processing was conducted in R 3.6.0  
586 (83) using the tidyverse package (92), the RColorBrewer package (93), and the cowplot package  
587 (94). The SUE (Eq. 3) and CUE (Eq. 4) values were both estimated by combining the isotopic  
588 data for  $\text{CO}_2$  and biomass as evaluated at stationary phase. The SUE was calculated as:

$$589 \quad SUE = \frac{{}^{13}\text{C}_{\text{MBIO}}}{{}^{13}\text{C}_{\text{CO}_2} + {}^{13}\text{C}_{\text{MBIO}}} \quad (3)$$

590 where  $^{13}\text{C}_{\text{CO}_2}$  (mg) and  $^{13}\text{C}_{\text{MBIO}}$  (mg) was determined for each replicate after subtraction of the  
591 average natural abundance  $^{13}\text{C}$  in both pools using atom percent  $^{13}\text{C}$  values from unlabeled  
592 treatments. The CUE was calculated similarly but using the total values of C.

$$593 \quad CUE = \frac{{}^{12}\text{C}_{\text{MBIO}} + {}^{13}\text{C}_{\text{MBIO}}}{({}^{12}\text{C}_{\text{CO}_2} + {}^{13}\text{C}_{\text{CO}_2}) + ({}^{12}\text{C}_{\text{MBIO}} + {}^{13}\text{C}_{\text{MBIO}})} \quad (4)$$

594 Statistical comparisons between treatments for dependent variables (*t*<sub>50</sub>, SUE) were analyzed first  
595 using ANOVA and then subsequent multiple comparison tests were conducted using Tukey's  
596 HSD. Correlations were assessed using linear regression.

597 **Data Availability.** The genome assembly for strain B1N (*Paraburkholderia solitsugae*)  
598 and strain B3N (*Ralstonia pickettii*) can be accessed via the NCBI portal using the BioProject  
599 accession numbers PRJNA590275. The ITS sequence for strain Oa1RB (*Penicillium*  
600 *spinulosum*) can be accessed via the NCBI GenBank portal using accession numbers MZ375756.  
601 Metabolomics data have been deposited to the EMBL-EBI MetaboLights database (DOI:  
602 10.1093/nar/gkz1019, PMID:31691833) with the identifier MTBLS3558 (95).

603

604

605

606

607

608

609

610

611

612

613

614

615

616

617 **Acknowledgements**

618 Graduate financial support for K.T.C. was provided by the College of Agriculture and  
619 Life Sciences at Cornell University. Partial graduate financial support and funding was provided  
620 by the Cornell University Program in Cross-Scale Biogeochemistry and Climate, which is  
621 supported by NSF-IGERT and the Atkinson Center for a Sustainable Future. Postdoctoral  
622 support for A.R.K. was provided by a National Science Foundation CAREER Grant (award #  
623 1653092) awarded to L.A. This work was also supported by the AFRI Education and Workforce  
624 Development Program, grant no. 2019-67011-29513, from the U.S. Department of Agriculture,  
625 National Institute of Food and Agriculture. We thank Roland Wilhelm, Dan Buckley, and  
626 Martínez Research Group members for helpful revisions to the manuscript. Sequencing was  
627 performed by the Biotechnology Resource Center (BRC) Genomics Facility at Cornell  
628 University (<http://www.biotech.cornell.edu/brc/genomics-facility>). <sup>1</sup>H NMR experiments were  
629 performed at the Cornell University NMR facility in the Department of Chemistry and Chemical  
630 Biology.

631

632

633

634

635

636

637

638

639

640 **References**

- 641 1. Marschner B, Kalbitz K. 2003. Controls of bioavailability and biodegradability of  
642 dissolved organic matter in soils. *Geoderma* 113:211-235.
- 643 2. Roth V-N, Lange M, Simon C, Hertkorn N, Bucher S, Goodall T, Griffiths RI, Mellado-  
644 Vázquez PG, Mommer L, Oram NJ. 2019. Persistence of dissolved organic matter  
645 explained by molecular changes during its passage through soil. *Nature Geoscience*  
646 12:755-761.
- 647 3. van Hees PAW, Jones DL, Finlay R, Godbold DL, Lundstomd US. 2005. The carbon we  
648 do not see - the impact of low molecular weight compounds on carbon dynamics and  
649 respiration in forest soils: a review. *Soil Biology & Biochemistry* 37:1-13.
- 650 4. Glanville H, Rousk J, Golyshin P, Jones D. 2012. Mineralization of low molecular weight  
651 carbon substrates in soil solution under laboratory and field conditions. *Soil Biology and*  
652 *Biochemistry* 48:88-95.
- 653 5. Jones DL, Edwards AC. 1998. Influence of sorption on the biological utilization of two  
654 simple carbon substrates. *Soil Biology & Biochemistry* 30:1895-1902.
- 655 6. Sasse J, Martinoia E, Northen T. 2018. Feed Your Friends: Do Plant Exudates Shape the  
656 Root Microbiome? *Trends in Plant Science* 23:25-41.
- 657 7. Jones D, Dennis P, Owen A, Van Hees P. 2003. Organic acid behavior in soils–  
658 misconceptions and knowledge gaps. *Plant and Soil* 248:31-41.
- 659 8. Chagas FO, de Cassia Pessotti R, Caraballo-Rodriguez AM, Pupo MT. 2018. Chemical  
660 signaling involved in plant–microbe interactions. *Chemical Society Reviews* 47:1652-  
661 1704.

- 662 9. Kuzyakov Y. 2006. Sources of CO<sub>2</sub> efflux from soil and review of partitioning methods.  
663 Soil Biology and Biochemistry 38:425-448.
- 664 10. Sokol NW, Sanderman J, Bradford MA. 2019. Pathways of mineral-associated soil  
665 organic matter formation: Integrating the role of plant carbon source, chemistry, and  
666 point of entry. Global Change Biology 25:12-24.
- 667 11. Fischer H, Ingwersen J, Kuzyakov Y. 2010. Microbial uptake of low-molecular-weight  
668 organic substances out-competes sorption in soil. European Journal of Soil Science  
669 61:504-513.
- 670 12. Glanville H, Hill P, Schnepf A, Oburger E, Jones D. 2016. Combined use of empirical  
671 data and mathematical modelling to better estimate the microbial turnover of isotopically  
672 labelled carbon substrates in soil. Soil Biology and Biochemistry 94:154-168.
- 673 13. Bradford MA, Keiser AD, Davies CA, Mersmann CA, Strickland MS. 2013. Empirical  
674 evidence that soil carbon formation from plant inputs is positively related to microbial  
675 growth. Biogeochemistry 113:271-281.
- 676 14. Brant JB, Sulzman EW, Myrold DD. 2006. Microbial community utilization of added  
677 carbon substrates in response to long-term carbon input manipulation. Soil Biology &  
678 Biochemistry 38:2219-2232.
- 679 15. Gunina A, Smith AR, Kuzyakov Y, Jones DL. 2017. Microbial uptake and utilization of  
680 low molecular weight organic substrates in soil depend on carbon oxidation state.  
681 Biogeochemistry 133:89-100.
- 682 16. Jones DL, Hodge A. 1999. Biodegradation kinetics and sorption reactions of three  
683 differently charged amino acids in soil and their effects on plant organic nitrogen  
684 availability. Soil Biology and Biochemistry 31:1331-1342.

- 685 17. Hill PW, Farrar JF, Jones DL. 2008. Decoupling of microbial glucose uptake and  
686 mineralization in soil. *Soil Biology and Biochemistry* 40:616-624.
- 687 18. Barnett SE, Youngblut ND, Koechli CN, Buckley DH. 2021. Life history strategies  
688 explain bacterial activity in the soil carbon cycle. *bioRxiv*  
689 doi:10.1101/2021.03.19.436178:2021.03.19.436178.
- 690 19. Gommers PJF, Vanschie BJ, Vandijken JP, Kuenen JG. 1988. Biochemical limits to  
691 microbial-growth yields - an analysis of mixed substrate utilization. *Biotechnology and*  
692 *Bioengineering* 32:86-94.
- 693 20. Roels J. 1980. Application of macroscopic principles to microbial metabolism.  
694 *Biotechnology and Bioengineering* 22:2457-2514.
- 695 21. Geyer KM, Kyker-Snowman E, Grandy AS, Frey SD. 2016. Microbial carbon use  
696 efficiency: accounting for population, community, and ecosystem-scale controls over the  
697 fate of metabolized organic matter. *Biogeochemistry* doi:10.1007/s10533-016-0191-y:1-  
698 16.
- 699 22. Li J, Wang G, Allison SD, Mayes MA, Luo Y. 2014. Soil carbon sensitivity to  
700 temperature and carbon use efficiency compared across microbial-ecosystem models of  
701 varying complexity. *Biogeochemistry* 119:67-84.
- 702 23. Liang C, Schimel JP, Jastrow JD. 2017. The importance of anabolism in microbial  
703 control over soil carbon storage. *Nature Microbiology* 2:17105.
- 704 24. Manzoni S, Taylor P, Richter A, Porporato A, Agren GI. 2012. Environmental and  
705 stoichiometric controls on microbial carbon-use efficiency in soils. *New Phytologist*  
706 196:79-91.

- 707 25. Roller BRK, Schmidt TM. 2015. The physiology and ecological implications of efficient  
708 growth. *ISME J* 9:1481-1487.
- 709 26. Roller BRK, Stoddard SF, Schmidt TM. 2016. Exploiting rRNA operon copy number to  
710 investigate bacterial reproductive strategies. *Nature Microbiology* 1:16160.
- 711 27. Kleber M. 2010. What is recalcitrant soil organic matter. *Environmental Chemistry*  
712 7:320-332.
- 713 28. LaRowe DE, Van Cappellen P. 2011. Degradation of natural organic matter: A  
714 thermodynamic analysis. *Geochimica Et Cosmochimica Acta* 75:2030-2042.
- 715 29. Garayburu-Caruso VA, Stegen JC, Song H-S, Renteria L, Wells J, Garcia W, Resch CT,  
716 Goldman AE, Chu RK, Toyoda J, Graham EB. 2020. Carbon Limitation Leads to  
717 Thermodynamic Regulation of Aerobic Metabolism. *Environmental Science &*  
718 *Technology Letters* 7:517-524.
- 719 30. Graham EB, Tfaily MM, Crump AR, Goldman AE, Bramer LM, Arntzen E, Romero E,  
720 Resch CT, Kennedy DW, Stegen JC. 2017. Carbon Inputs From Riparian Vegetation  
721 Limit Oxidation of Physically Bound Organic Carbon Via Biochemical and  
722 Thermodynamic Processes. *Journal of Geophysical Research: Biogeosciences* 122:3188-  
723 3205.
- 724 31. Stegen JC, Johnson T, Fredrickson JK, Wilkins MJ, Konopka AE, Nelson WC, Arntzen  
725 EV, Chrisler WB, Chu RK, Fansler SJ, Graham EB, Kennedy DW, Resch CT, Tfaily M,  
726 Zachara J. 2018. Influences of organic carbon speciation on hyporheic corridor  
727 biogeochemistry and microbial ecology. *Nature Communications* 9:585.
- 728 32. Cyle KT, Klein AR, Aristilde L, Martínez CE. 2020. Ecophysiological Study of  
729 *Paraburkholderia* sp. Strain 1N under Soil Solution Conditions: Dynamic Substrate



- 730 Preferences and Characterization of Carbon Use Efficiency. *Applied and Environmental*  
731 *Microbiology* 86:e01851-20.
- 732 33. Egli T. 1995. The Ecological and Physiological Significance of the Growth of  
733 Heterotrophic Microorganisms with Mixtures of Substrates, p 305-386. *In* Jones JG (ed),  
734 *Advances in Microbial Ecology* doi:10.1007/978-1-4684-7724-5\_8. Springer US, Boston,  
735 MA.
- 736 34. Kovárová-Kovar K, Egli T. 1998. Growth kinetics of suspended microbial cells: from  
737 single-substrate-controlled growth to mixed-substrate kinetics. *Microbiology and*  
738 *molecular biology reviews* 62:646-666.
- 739 35. Kukurugya MA, Mendonca CM, Solhtalab M, Wilkes RA, Thannhauser TW, Aristilde L.  
740 2019. Multi-omics analysis unravels a segregated metabolic flux network that tunes co-  
741 utilization of sugar and aromatic carbons in *Pseudomonas putida*. *Journal of Biological*  
742 *Chemistry* 294:8464-8479.
- 743 36. Perrin E, Ghini V, Giovannini M, Di Patti F, Cardazzo B, Carraro L, Fagorzi C, Turano  
744 P, Fani R, Fondi M. 2020. Diauxie and co-utilization of carbon sources can coexist  
745 during bacterial growth in nutritionally complex environments. *Nature Communications*  
746 11:3135.
- 747 37. Song H-S, Stegen JC, Graham EB, Lee J-Y, Garayburu-Caruso VA, Nelson WC, Chen  
748 X, Moulton JD, Scheibe TD. 2020. Representing Organic Matter Thermodynamics in  
749 Biogeochemical Reactions via Substrate-Explicit Modeling. *Frontiers in Microbiology*  
750 11.

- 751 38. Tang JY, Riley WJ. 2013. A total quasi-steady-state formulation of substrate uptake  
752 kinetics in complex networks and an example application to microbial litter  
753 decomposition. *Biogeosciences* 10:8329-8351.
- 754 39. Gunina A, Dippold MA, Glaser B, Kuzyakov Y. 2014. Fate of low molecular weight  
755 organic substances in an arable soil: From microbial uptake to utilisation and  
756 stabilisation. *Soil Biology and Biochemistry* 77:304-313.
- 757 40. Erbilgin O, Bowen BP, Kosina SM, Jenkins S, Lau RK, Northen TR. 2017. Dynamic  
758 substrate preferences predict metabolic properties of a simple microbial consortium.  
759 *BMC bioinformatics* 18:57.
- 760 41. Zhalnina K, Louie KB, Hao Z, Mansoori N, da Rocha UN, Shi S, Cho H, Karaoz U,  
761 Loqué D, Bowen BP, Firestone MK, Northen TR, Brodie EL. 2018. Dynamic root  
762 exudate chemistry and microbial substrate preferences drive patterns in rhizosphere  
763 microbial community assembly. *Nature Microbiology* 3:470-480.
- 764 42. Fierer N, Bradford MA, Jackson RB. 2007. Toward an ecological classification of soil  
765 bacteria. *Ecology* 88:1354-1364.
- 766 43. Waring BG, Averill C, Hawkes CV. 2013. Differences in fungal and bacterial physiology  
767 alter soil carbon and nitrogen cycling: insights from meta-analysis and theoretical  
768 models. *Ecology Letters* 16:887-894.
- 769 44. Soares M, Rousk J. 2019. Microbial growth and carbon use efficiency in soil: Links to  
770 fungal-bacterial dominance, SOC-quality and stoichiometry. *Soil Biology and*  
771 *Biochemistry* 131:195-205.

- 772 45. Blagodatskaya E, Blagodatsky S, Dorodnikov M, Kuzyakov Y. 2010. Elevated  
773 atmospheric CO<sub>2</sub> increases microbial growth rates in soil: results of three CO<sub>2</sub>  
774 enrichment experiments. *Global Change Biology* 16:836-848.
- 775 46. Blagodatskaya EV, Blagodatsky SA, Anderson T-H, Kuzyakov Y. 2009. Contrasting  
776 effects of glucose, living roots and maize straw on microbial growth kinetics and  
777 substrate availability in soil. *European Journal of Soil Science* 60:186-197.
- 778 47. Loeppmann S, Semenov M, Blagodatskaya E, Kuzyakov Y. 2016. Substrate quality  
779 affects microbial- and enzyme activities in rooted soil. *Journal of Plant Nutrition and Soil*  
780 *Science* 179:39-47.
- 781 48. Rousk J, Frey SD. 2015. Revisiting the hypothesis that fungal-to-bacterial dominance  
782 characterizes turnover of soil organic matter and nutrients. *Ecological Monographs*  
783 85:457-472.
- 784 49. Adu JK, Oades JM. 1978. Utilization of organic materials in soil aggregates by bacteria  
785 and fungi. *Soil Biology and Biochemistry* 10:117-122.
- 786 50. Lipson DA. 2015. The complex relationship between microbial growth rate and yield and  
787 its implications for ecosystem processes. *Frontiers in Microbiology* 6.
- 788 51. Sinsabaugh RL, Moorhead DL, Xu X, Litvak ME. 2017. Plant, microbial and ecosystem  
789 carbon use efficiencies interact to stabilize microbial growth as a fraction of gross  
790 primary production. *New Phytologist* 214:1518-1526.
- 791 52. Spohn M, Pötsch EM, Eichorst SA, Wobken D, Wanek W, Richter A. 2016. Soil  
792 microbial carbon use efficiency and biomass turnover in a long-term fertilization  
793 experiment in a temperate grassland. *Soil Biology and Biochemistry* 97:168-175.

- 794 53. Linton JD, Stephenson RJ. 1978. A preliminary study on growth yields in relation to the  
795 carbon and energy content of various organic growth substrates. *FEMS Microbiology*  
796 *Letters* 3:95-98.
- 797 54. Malik AA, Puissant J, Goodall T, Allison SD, Griffiths RI. 2019. Soil microbial  
798 communities with greater investment in resource acquisition have lower growth yield.  
799 *Soil Biology and Biochemistry* 132:36-39.
- 800 55. Sinsabaugh RL, Manzoni S, Moorhead DL, Richter A. 2013. Carbon use efficiency of  
801 microbial communities: stoichiometry, methodology and modelling. *Ecology Letters*  
802 16:930-939.
- 803 56. Geyer KM, Dijkstra P, Sinsabaugh R, Frey SD. 2019. Clarifying the interpretation of  
804 carbon use efficiency in soil through methods comparison. *Soil Biology and*  
805 *Biochemistry* 128:79-88.
- 806 57. Malik AA, Martiny JBH, Brodie EL, Martiny AC, Treseder KK, Allison SD. 2020.  
807 Defining trait-based microbial strategies with consequences for soil carbon cycling under  
808 climate change. *The ISME Journal* 14:1-9.
- 809 58. Görke B, Stülke J. 2008. Carbon catabolite repression in bacteria: many ways to make the  
810 most out of nutrients. *Nature Reviews Microbiology* 6:613-624.
- 811 59. Kremling A, Geiselmann J, Ropers D, de Jong H. 2015. Understanding carbon catabolite  
812 repression in *Escherichia coli* using quantitative models. *Trends in Microbiology* 23:99-  
813 109.
- 814 60. Calabrese F, Stryhanyuk H, Moraru C, Schlömann M, Wick LY, Richnow HH, Musat F,  
815 Musat N. 2021. Metabolic history and metabolic fitness as drivers of anabolic  
816 heterogeneity in isogenic microbial populations. *Environmental Microbiology* n/a.

- 817 61. Ackermann M. 2015. A functional perspective on phenotypic heterogeneity in  
818 microorganisms. *Nature Reviews Microbiology* 13:497-508.
- 819 62. Varahan S, Laxman S. 2021. Bend or break: how biochemically versatile molecules  
820 enable metabolic division of labor in clonal microbial communities. *Genetics* 219.
- 821 63. Tang J, Riley WJ. 2019. Competitor and substrate sizes and diffusion together define  
822 enzymatic depolymerization and microbial substrate uptake rates. *Soil Biology and*  
823 *Biochemistry* 139:107624.
- 824 64. Vinolas LC, Healey JR, Jones DL. 2001. Kinetics of soil microbial uptake of free amino  
825 acids. *Biology and Fertility of Soils* 33:67-74.
- 826 65. Geisseler D, Horwath WR, Joergensen RG, Ludwig B. 2010. Pathways of nitrogen  
827 utilization by soil microorganisms – A review. *Soil Biology and Biochemistry* 42:2058-  
828 2067.
- 829 66. Knowles TDJ, Chadwick DR, Bol R, Evershed RP. 2010. Tracing the rate and extent of  
830 N and C flow from <sup>13</sup>C,<sup>15</sup>N-glycine and glutamate into individual de novo synthesised  
831 soil amino acids. *Organic Geochemistry* 41:1259-1268.
- 832 67. Dijkhuizen L, Harder W. 1984. Regulation of Autotrophic and Heterotrophic Metabolism  
833 in *Pseudomonas oxalaticus* OX1. Growth on Fructose and on Mixtures of Fructose and  
834 Formate in Batch and Continuous Cultures. *Microbiology* 130:447-457.
- 835 68. Quayle J. 1961. Metabolism of C Compounds in Autotrophic and Heterotrophic  
836 Microorganisms. *Annual Reviews in Microbiology* 15:119-152.
- 837 69. Braun A, Spona-Friedl M, Avramov M, Elsner M, Baltar F, Reinthaler T, Herndl GJ,  
838 Griebler C. 2021. Reviews and syntheses: Heterotrophic fixation of inorganic carbon –

- 839 significant but invisible flux in environmental carbon cycling. *Biogeosciences* 18:3689-  
840 3700.
- 841 70. Friedrich CG, Bowien B, Friedrich B. 1979. Formate and Oxalate Metabolism in  
842 *Alcaligenes eutrophus*. *Microbiology* 115:185-192.
- 843 71. Roberts P, Stockdale R, Khalid M, Iqbal Z, Jones DL. 2009. Carbon-to-nitrogen ratio is a  
844 poor predictor of low molecular weight organic nitrogen mineralization in soil. *Soil*  
845 *Biology and Biochemistry* 41:1750-1752.
- 846 72. Liebeke M, Brozel VS, Hecker M, Lalk M. 2009. Chemical characterization of soil  
847 extract as growth media for the ecophysiological study of bacteria. *Applied Microbiology*  
848 *and Biotechnology* 83:161-173.
- 849 73. Dabek-Szreniawska M, Hattori T. 1981. Winogradsky's salts solution as a diluting  
850 medium for plate count of oligotrophic bacteria in soil. *The Journal of General and*  
851 *Applied Microbiology* 27:517-518.
- 852 74. Raja HA, Miller AN, Pearce CJ, Oberlies NH. 2017. Fungal Identification Using  
853 Molecular Tools: A Primer for the Natural Products Research Community. *Journal of*  
854 *Natural Products* 80:756-770.
- 855 75. Wilhelm RC, Cyle KT, Martinez CE, Karasz DC, Newman JD, Buckley DH. 2020.  
856 *Paraburkholderia solitsugae* sp. nov. and *Paraburkholderia elongata* sp. nov., phenolic  
857 acid-degrading bacteria isolated from forest soil and emended description of  
858 *Paraburkholderia madseniana*. *International Journal of Systematic and Evolutionary*  
859 *Microbiology* doi:<https://doi.org/10.1099/ijsem.0.004387>.
- 860 76. Yabuuchi E, Kosako Y, Yano I, Hotta H, Nishiuchi Y. 1995. Transfer of Two  
861 *Burkholderia* and An *Alcaligenes* Species to *Ralstonia* Gen. Nov.: Proposal of *Ralstonia*

- 862 *pickettii* (Ralston, Palleroni and Doudoroff 1973) Comb. Nov., *Ralstonia solanacearum*  
863 (Smith 1896) Comb. Nov. and *Ralstonia eutropha* (Davis 1969) Comb. Nov.  
864 Microbiology and Immunology 39:897-904.
- 865 77. Haugland RA, Varma M, Wymer LJ, Vesper SJ. 2004. Quantitative PCR analysis of  
866 selected *Aspergillus*, *Penicillium* and *Paecilomyces* species. Syst Appl Microbiol 27:198-  
867 210.
- 868 78. Atlas RM. 2010. Handbook of microbiological media. CRC press.
- 869 79. Aristilde L, Reed ML, Wilkes RA, Youngster T, Kukurugya MA, Katz V, Sasaki CRS.  
870 2017. Glyphosate-Induced Specific and Widespread Perturbations in the Metabolome of  
871 Soil *Pseudomonas* Species. Frontiers in Environmental Science 5:34.
- 872 80. Lu W, Clasquin MF, Melamud E, Amador-Noguez D, Caudy AA, Rabinowitz JD. 2010.  
873 Metabolomic analysis via reversed-phase ion-pairing liquid chromatography coupled to a  
874 stand alone orbitrap mass spectrometer. Analytical chemistry 82:3212-3221.
- 875 81. Klein AR, Barzen-Hanson KA, Aristilde L. 2020. A non-derivatized method  
876 for simultaneous quantitation of proteinogenic, urea-cycle, and acetylated amino acids by  
877 liquid chromatography–high-resolution mass spectrometry. Environmental Chemistry  
878 Letters 18:229-235.
- 879 82. Hochgräfe F, Wolf C, Fuchs S, Liebeke M, Lalk M, Engelmann S, Hecker M. 2008.  
880 Nitric Oxide Stress Induces Different Responses but Mediates Comparable Protein Thiol  
881 Protection in *Bacillus subtilis* and *Staphylococcus aureus*. Journal of Bacteriology  
882 190:4997-5008.
- 883 83. R Core Team. 2019. R: A Language and Environment for Statistical Computing, R  
884 Foundation for Statistical Computing, Vienna, Austria. <https://www.R-project.org/>.

- 885 84. Padfield D, Matheson G. 2018. nls.multstart: Robust Non-Linear Regression using AIC  
886 Scores, <https://CRAN.R-project.org/package=nls.multstart>.
- 887 85. Zwietering MH, Jongenburger I, Rombouts FM, van 't Riet K. 1990. Modeling of the  
888 Bacterial Growth Curve. *Applied and Environmental Microbiology* 56:1875-1881.
- 889 86. Petzoldt T. 2018. growthrates: Estimate Growth Rates from Experimental Data.,  
890 <https://CRAN.R-project.org/package=growthrates>.
- 891 87. Hall BG, Acar H, Nandipati A, Barlow M. 2013. Growth Rates Made Easy. *Molecular*  
892 *Biology and Evolution* 31:232-238.
- 893 88. Genolini C, Alacoque X, Sentenac M, Arnaud C. 2015. kml and kml3d: R Packages to  
894 Cluster Longitudinal Data. 2015 65:34.
- 895 89. Liu Y, Li Z, Xiong H, Gao X, Wu J. Understanding of Internal Clustering Validation  
896 Measures, p 911-916. *In* (ed),
- 897 90. Behrends V, Ebbels TMD, Williams HD, Bundy JG. 2009. Time-Resolved Metabolic  
898 Footprinting for Nonlinear Modeling of Bacterial Substrate Utilization. *Applied and*  
899 *Environmental Microbiology* 75:2453-2463.
- 900 91. Wilhelm RC, DeRito CM, Shapleigh JP, Madsen EL, Buckley DH. 2021. Phenolic acid-  
901 degrading Paraburkholderia prime decomposition in forest soil. *ISME Communications*  
902 1:4.
- 903 92. Wickham H, Averick M, Bryan J, Chang W, McGowan LDA, François R, Golemund G,  
904 Hayes A, Henry L, Hester J. 2019. Welcome to the Tidyverse. *Journal of Open Source*  
905 *Software* 4:1686.
- 906 93. Neuwirth E. 2014. RColorBrewer: ColorBrewer Palettes, [https://CRAN.R-](https://CRAN.R-project.org/package=RColorBrewer)  
907 [project.org/package=RColorBrewer](https://CRAN.R-project.org/package=RColorBrewer).



- 908 94. Wilke CO. 2020. cowplot: Streamlined Plot Theme and Plot Annotations for 'ggplot2',  
909 <https://CRAN.R-project.org/package=cowplot>.
- 910 95. Haug K, Cochrane K, Nainala VC, Williams M, Chang J, Jayaseelan KV, O'Donovan C.  
911 2019. MetaboLights: a resource evolving in response to the needs of its scientific  
912 community. Nucleic Acids Research 48:D440-D444.
- 913  
914  
915  
916  
917  
918  
919  
920  
921  
922  
923  
924  
925  
926  
927  
928  
929  
930

931 **Tables**

932

933

934

935

936

937

938

Table 1. Observations and modeled growth curve fit parameters using biomass data.

|                      | <u>Observations</u>                       |                         |           | <u>Gompertz Fit</u>          |                                          |                                 | <u>Normalized Fit*</u>                   |
|----------------------|-------------------------------------------|-------------------------|-----------|------------------------------|------------------------------------------|---------------------------------|------------------------------------------|
|                      | <u><math>k</math> (mg L<sup>-1</sup>)</u> | <u>Final sample (h)</u> | <u>%C</u> | <u>A (mg L<sup>-1</sup>)</u> | <u><math>\mu</math> (h<sup>-1</sup>)</u> | <u><math>\lambda</math> (h)</u> | <u><math>\mu</math> (h<sup>-1</sup>)</u> |
| <i>R. pickettii</i>  | 674.23                                    | 22                      | 43.4      | 76.05                        | 21.28                                    | 12.55                           | 0.32                                     |
| <i>P. solitsugae</i> | 387.32                                    | 24                      | 28.9      | 49.80                        | 6.44                                     | 11.75                           | 0.29                                     |
| <i>P. spinulosum</i> | -                                         | 120                     | 43.9      | 46.36                        | 1.63                                     | 42.35                           | 0.04                                     |

$k$  – biomass conversion factor, A – stationary phase asymptote,  $\mu$  - specific growth rate,  $\lambda$  - lag time.

\*Normalized approach (Hall et al., 2013).

939

940

941

942

943

944

945

946

947

948

949

950 **Figures**

951

952 **FIG 1** Depletion dynamics for observed LMWOS. Plots are paired by microbial isolate depicting  
953 depletion dynamics (A, C, E) and usage window plots (B, D, F) for uptake clusters identified  
954 using a k-means approach. Lines (A, C, E) are individual substrate uptake patterns normalized to  
955 initial concentration (mean,  $n = 3$ ) with the thickest line showing the mean of the cluster. All  
956 points in usage window plots (B, D, F) are the mean modeled midpoints of depletion ( $t_{50}$ ) plotted  
957 over the growth curve of the isolate (black line). The mean midpoint of overall carbon depletion  
958 is shown with a black circle. Horizontal bars around each  $t_{50}$  show the usage window (10% -  
959 90% of initial concentration). All substrates are colored by cluster and listed in the legend in  
960 order of increasing  $t_{50}$ . Ala, alanine; arg, arginine; asn, asparagine; cit, citrulline; cys, cysteine;  
961 glu, glutamate; gln, glutamine; gly, glycine; his, histidine; lys, lysine; met, methionine; orn,  
962 ornithine; ile, isoleucine; leu, leucine; lys, lysine; phe, phenylalanine; pro, proline; ser, serine;  
963 thr, threonine; trp, tryptophan; val, valine; ace, acetate; akg,  $\alpha$ -ketoglutarate; form, formate;  
964 glucon, gluconate; lac, lactate; mal, malate; oxa, oxalate; pyr, pyruvate; succ, succinate.

965

966 **FIG 2** Inflection points of substrate depletion ( $t_{50}$ ) normalized to stationary phase sampling time  
967 as a function of substrate oxidation state (NOSC). Normalized  $t_{50}$  values are the mean of three  
968 biological replicates with error bars representing standard error. Plots are paneled according to  
969 microbial isolate (A, B, C) and shapes illustrate cluster affiliation as determined using k-means  
970 clustering. Colors represent compound class (amino acid or organic acid).

971

972

973 **FIG 3** Biomass-normalized maximum depletion rate (A-C) as a function of the inflection point  
974 of depletion ( $t_{50}$ ) normalized to stationary phase sampling time. Values are the mean of three  
975 biological replicates with error bars representing standard error. Shapes illustrate cluster  
976 affiliation and colors represent compound class (amino acid or organic acid). The vertical dashed  
977 line depicts the normalized  $t_{50}$  of overall carbon depletion from the media. Several points were  
978 removed for visualization purposes due to high variance between biological replicates (*P.*  
979 *solitsugae* – isoleucine, *P. spinulosum* – cystine & succinate).

980

981 **FIG 4** Respiration dynamics of  $^{13}\text{C}$ -labeled substrates and cumulative respiration along with  
982 estimates of substrate use efficiency (SUE). Graphs are grouped vertically for the three microbial  
983 isolates and arranged in order of decreasing specific growth rate (*R. pickettii* > *P. solitsugae* > *P.*  
984 *spinulosum*). Panels display respiration as a function of time in the first row of panels (A-C),  
985 SUE as a function of the midpoint of respiration,  $t_{50}$ , (D-F), and SUE as a function of substrate  
986 oxidation state (G-I). The dashed vertical line in plots A-F indicates stationary phase of the  
987 overall growth curve and the sample point for determination of  $^{13}\text{C}$  present in microbial biomass.  
988 The dashed horizontal line in plots G-I indicates the cumulative carbon use efficiency of all  
989 carbon sources. See Fig. S6 for full panel A and Table S6 for microbial biomass carbon and  
990 nitrogen composition data. Glc, glucose; Ace, acetate; Form, formate; Gly, glycine; Val, valine.

991

992 **FIG 5** Summary chart outlining the results of this study and the possible implications at the  
993 community level. Created with BioRender.com.

994

995

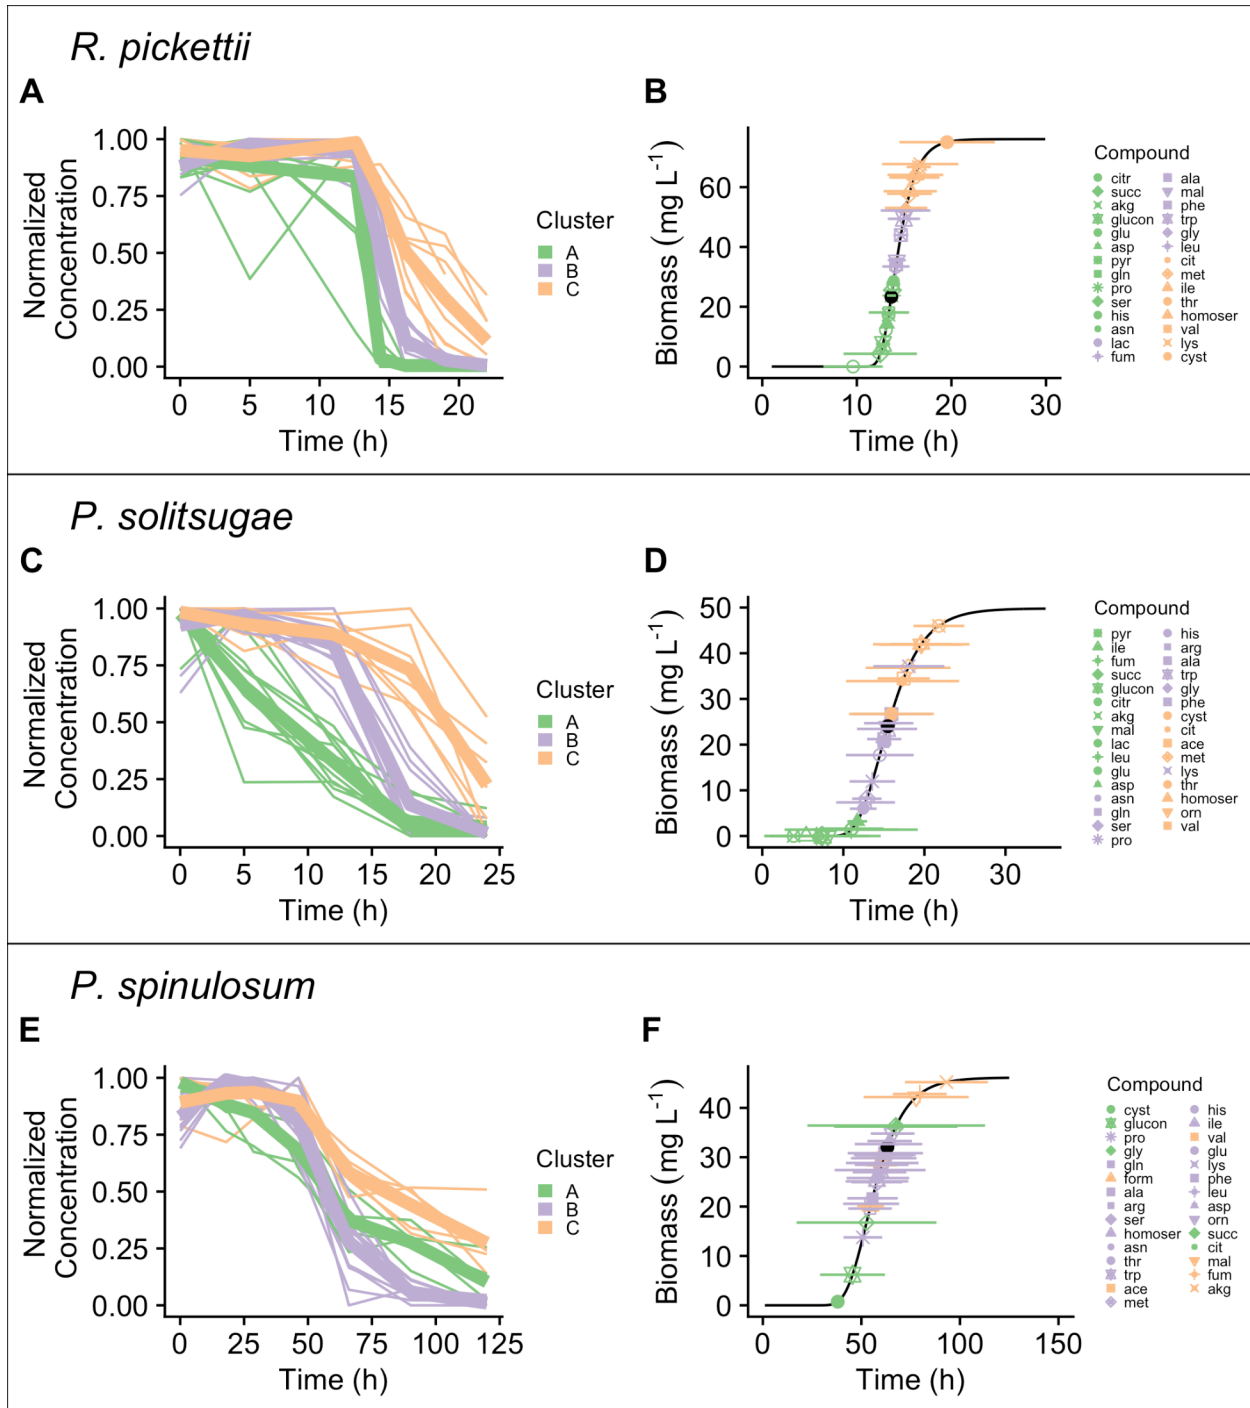

1  
2 **FIG 1** Depletion dynamics for observed LMWOS. Plots are paired by microbial isolate depicting  
3 depletion dynamics (A, C, E) and usage window plots (B, D, F) for uptake clusters identified  
4 using a k-means approach. Lines (A, C, E) are individual substrate uptake patterns normalized to  
5 initial concentration (mean, n = 3) with the thickest line showing the mean of the cluster. All

6 points in usage window plots (B, D, F) are the mean modeled midpoints of depletion ( $t_{50}$ ) plotted  
7 over the growth curve of the isolate (black line). The mean midpoint of overall carbon depletion  
8 is shown with a black circle. Horizontal bars around each  $t_{50}$  show the usage window (10% -  
9 90% of initial concentration). All substrates are colored by cluster and listed in the legend in  
10 order of increasing  $t_{50}$ . Ala, alanine; arg, arginine; asn, asparagine; cit, citrulline; cys, cysteine;  
11 glu, glutamate; gln, glutamine; gly, glycine; his, histidine; lys, lysine; met, methionine; orn,  
12 ornithine; ile, isoleucine; leu, leucine; lys, lysine; phe, phenylalanine; pro, proline; ser, serine;  
13 thr, threonine; trp, tryptophan; val, valine; ace, acetate; akg,  $\alpha$ -ketoglutarate; form, formate;  
14 glucon, gluconate; lac, lactate; mal, malate; oxa, oxalate; pyr, pyruvate; succ, succinate.

15

16

17

18

19

20

21

22

23

24

25

26

27

28

29  
30  
31  
32  
33  
34

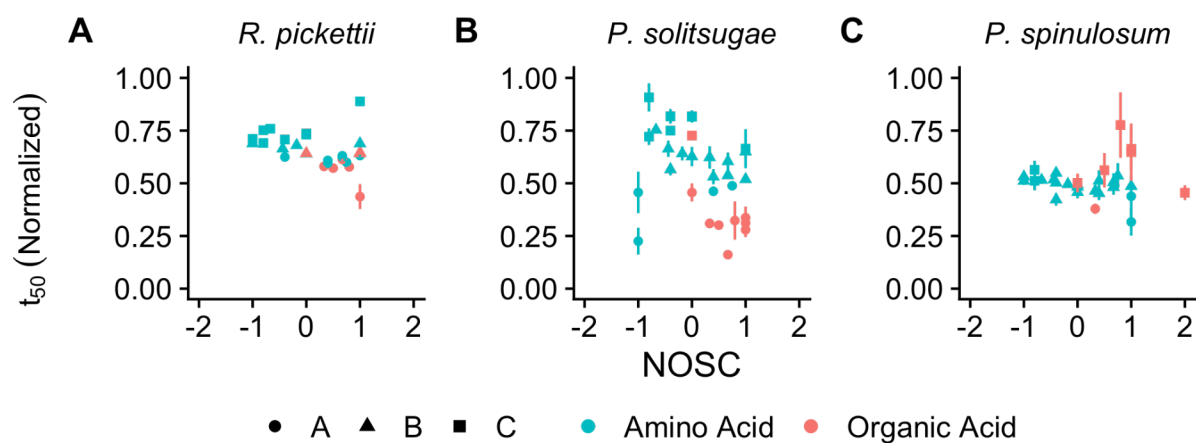

35  
36  
37  
38  
39  
40  
41  
42  
43  
44  
45  
46

**FIG 2** Inflection points of substrate depletion ( $t_{50}$ ) normalized to stationary phase sampling time as a function of substrate oxidation state (NOSC). Normalized  $t_{50}$  values are the mean of three biological replicates with error bars representing standard error. Plots are paneled according to microbial isolate (A, B, C) and shapes illustrate cluster affiliation as determined using k-means clustering. Colors represent compound class (amino acid or organic acid).

47  
48  
49  
50  
51

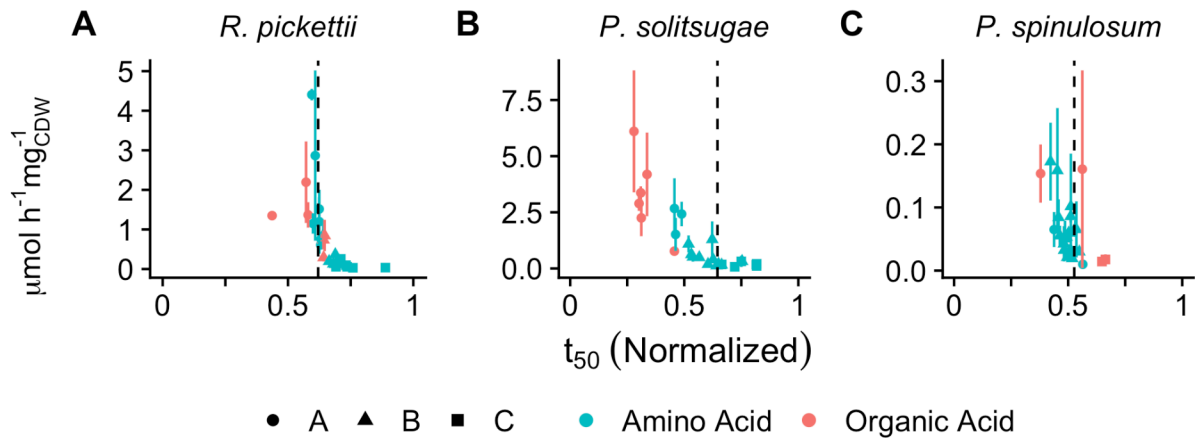

52

53 **FIG 3** Biomass-normalized maximum depletion rate (A-C) as a function of the inflection point  
54 of depletion ( $t_{50}$ ) normalized to stationary phase sampling time. Values are the mean of three  
55 biological replicates with error bars representing standard error. Shapes illustrate cluster  
56 affiliation and colors represent compound class (amino acid or organic acid). The vertical dashed  
57 line depicts the normalized  $t_{50}$  of overall carbon depletion from the media. Several points were  
58 removed for visualization purposes due to high variance between biological replicates (*P.*  
59 *solitsugae* – isoleucine, *P. spinulosum* – cystine & succinate).

60

61

62

63

64



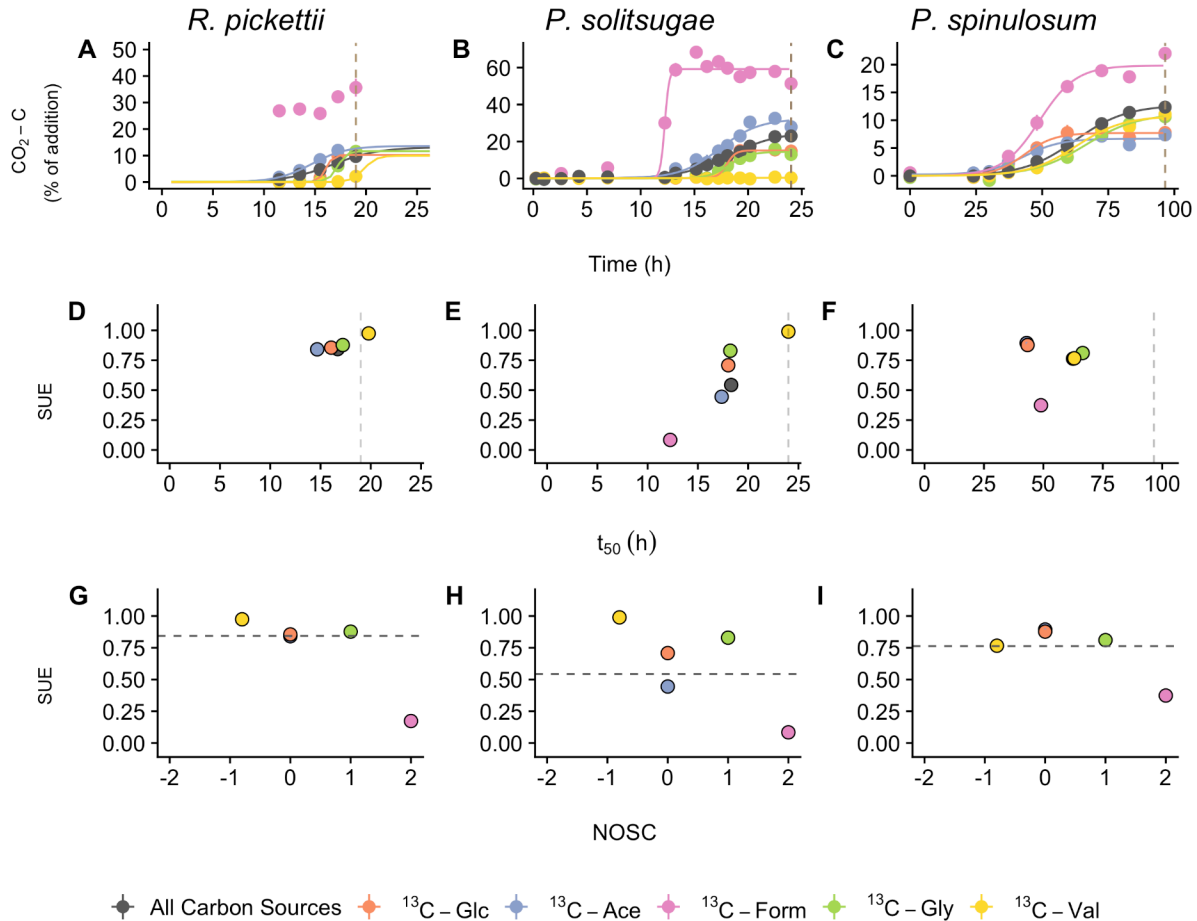

65

66 **FIG 4** Respiration dynamics of <sup>13</sup>C-labeled substrates and cumulative respiration along with  
67 estimates of substrate use efficiency (SUE). Graphs are grouped vertically for the three microbial  
68 isolates and arranged in order of decreasing specific growth rate (*R. pickettii* > *P. solitsugae* > *P.*  
69 *spinulosum*). Panels display respiration as a function of time in the first row of panels (A-C),  
70 SUE as a function of the midpoint of respiration, t<sub>50</sub>, (D-F), and SUE as a function of substrate  
71 oxidation state (G-I). The dashed vertical line in plots A-F indicates stationary phase of the  
72 overall growth curve and the sample point for determination of <sup>13</sup>C present in microbial biomass.  
73 The dashed horizontal line in plots G-I indicates the cumulative carbon use efficiency of all  
74 carbon sources. See Fig. S6 for full panel A and Table S6 for microbial biomass carbon and  
75 nitrogen composition data. Glc, glucose; Ace, acetate; Form, formate; Gly, glycine; Val, valine.

76

77

78

79

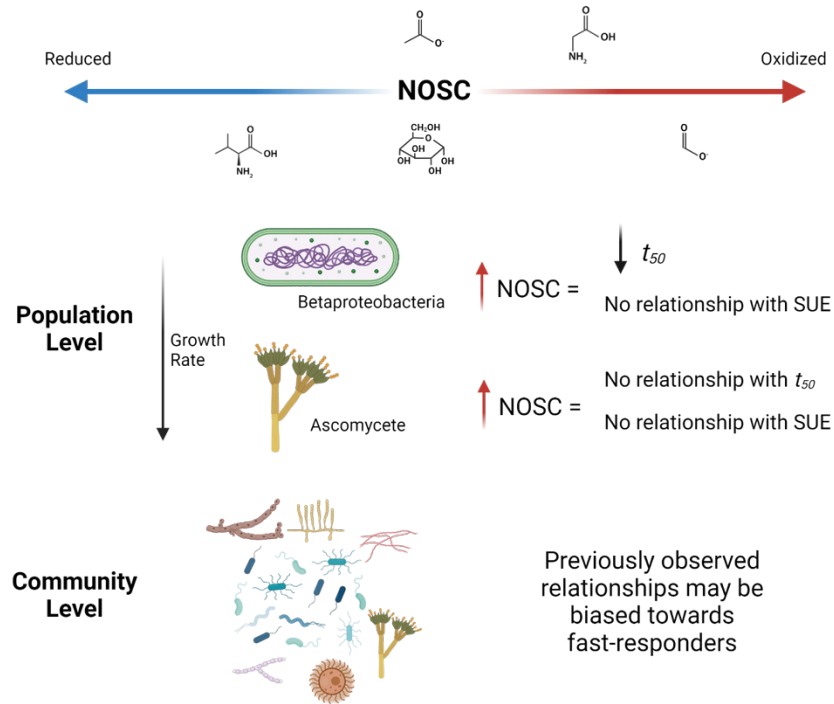

80

81 **FIG 5** Summary chart outlining the results of this study and the possible implications at the

82 community level. Created with BioRender.com.

83

84

85

86

87
